# Supplementary material
Source: MDPI journal article supplement (https://www.mdpi.com/2312-7481/9/1/25)
Supplement: s1 [file s1]

Supporting information

***Structure and Magnetism of Iron-Substituted Nickel Hydroxide Nanosheets***

Samuel W. Kimmel <sup>1,‡</sup>, Barry D. Koehne <sup>1,‡</sup>, Ben Gibson <sup>2</sup>, Wilhelmus J. Geerts <sup>1,3</sup>, Nikoleta Theodoropoulou <sup>1,3</sup> and Christopher P. Rhodes <sup>1,2,\*</sup>

<sup>1</sup>Material Science, Engineering, and Commercialization Program Texas State University, San Marcos, TX 78666, USA

<sup>2</sup>Department of Chemistry and Biochemistry, Texas State University, San Marcos, TX 78666, USA

<sup>3</sup>Department of Physics, Texas State University, San Marcos, TX 78666, USA

<sup>‡</sup>These authors contributed equally to this work

\*corresponding authors, e-mail: cprhodes@txstate.edu; ntheo@txstate.edu

**Table S1.** Mass and volume of chemical precursors used for the microwave synthesis of Ni(OH)<sub>2</sub> and Fe-substituted Ni(OH)<sub>2</sub> nanosheets.

| Precursor                                    | Ni <sub>1-x</sub> Fe <sub>x</sub> ratio |                                       |                                       |                                       |                                       |
|----------------------------------------------|-----------------------------------------|---------------------------------------|---------------------------------------|---------------------------------------|---------------------------------------|
|                                              | Ni <sub>1.00</sub> Fe <sub>0.00</sub>   | Ni <sub>0.95</sub> Fe <sub>0.05</sub> | Ni <sub>0.90</sub> Fe <sub>0.10</sub> | Ni <sub>0.80</sub> Fe <sub>0.20</sub> | Ni <sub>0.50</sub> Fe <sub>0.50</sub> |
| Ni(NO) <sub>2</sub> · 6 H <sub>2</sub> O (g) | 1.00                                    | 0.95                                  | 0.90                                  | 0.80                                  | 0.50                                  |
| FeSO <sub>4</sub> · 7 H <sub>2</sub> O (g)   | 0.00                                    | 0.478                                 | 0.956                                 | 0.1434                                | 0.478                                 |
| Urea (g)                                     | 0.82                                    |                                       |                                       |                                       |                                       |
| H <sub>2</sub> O (mL)                        | 3.0                                     |                                       |                                       |                                       |                                       |
| Ethylene glycol (mL)                         | 21.0                                    |                                       |                                       |                                       |                                       |

A pure solution of nickel nitrate, urea, ethylene glycol and water without any iron sulfate (Ni<sub>1.00</sub>Fe<sub>0.00</sub>) produces an opaque green solution before the microwave reaction. In contrast, a pure solution of iron sulfate, urea, ethylene glycol and water without any nickel nitrate (Ni<sub>0.00</sub>Fe<sub>1.00</sub>) produces an opaque yellow solution (Figure S1a). Substituting nickel nitrate for iron sulfate gradually changes the color of the pre-reaction solution from the characteristic green of a pure nickel nitrate solution to the yellow of a pure iron sulfate solution. After microwave heating, the colors of the reactants progressively darken from a light green (Ni<sub>1.00</sub>Fe<sub>0.00</sub>) to progressively darker shades of yellow (Ni<sub>0.95</sub>Fe<sub>0.05</sub>), orange (Ni<sub>0.90</sub>Fe<sub>0.10</sub>), light brown (Ni<sub>0.80</sub>Fe<sub>0.20</sub>), rust colored (Ni<sub>0.50</sub>Fe<sub>0.50</sub>) and dark brown (Ni<sub>0.00</sub>Fe<sub>1.00</sub>) with increasing iron content (Figure S1b); the color changes observed in the post-reaction solutions are also present during washing and centrifugation and after drying (Figure S1c-d).

a) Before microwave reaction

b) After microwave reaction

c) After washing & centrifugation

d) After drying

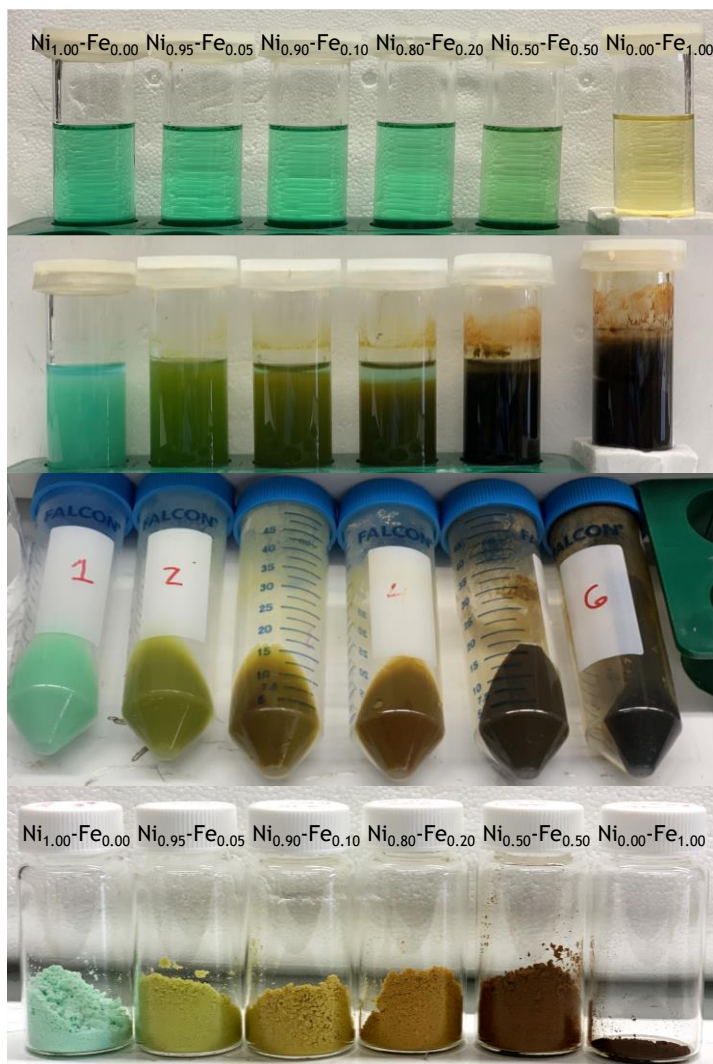

**Figure S1.** Photographs of the microwave synthesized iron-substituted nanosheet powders a) before microwave reaction, b) after the microwave reaction, c) after washing and centrifugation, and d) after drying.

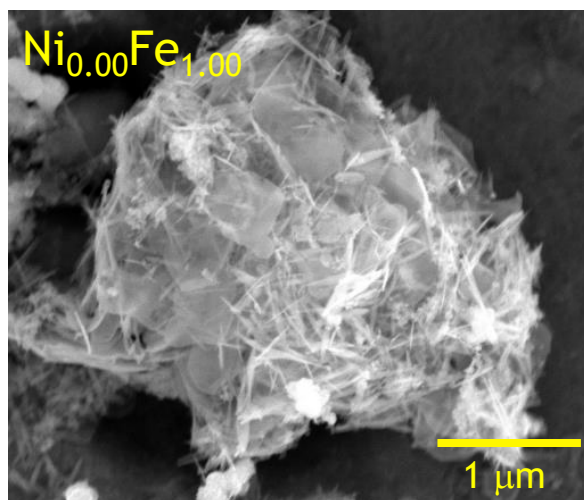

**Figure S2.** Scanning electron micrograph of  $\text{Ni}_{0.00}\text{Fe}_{1.00}$ .

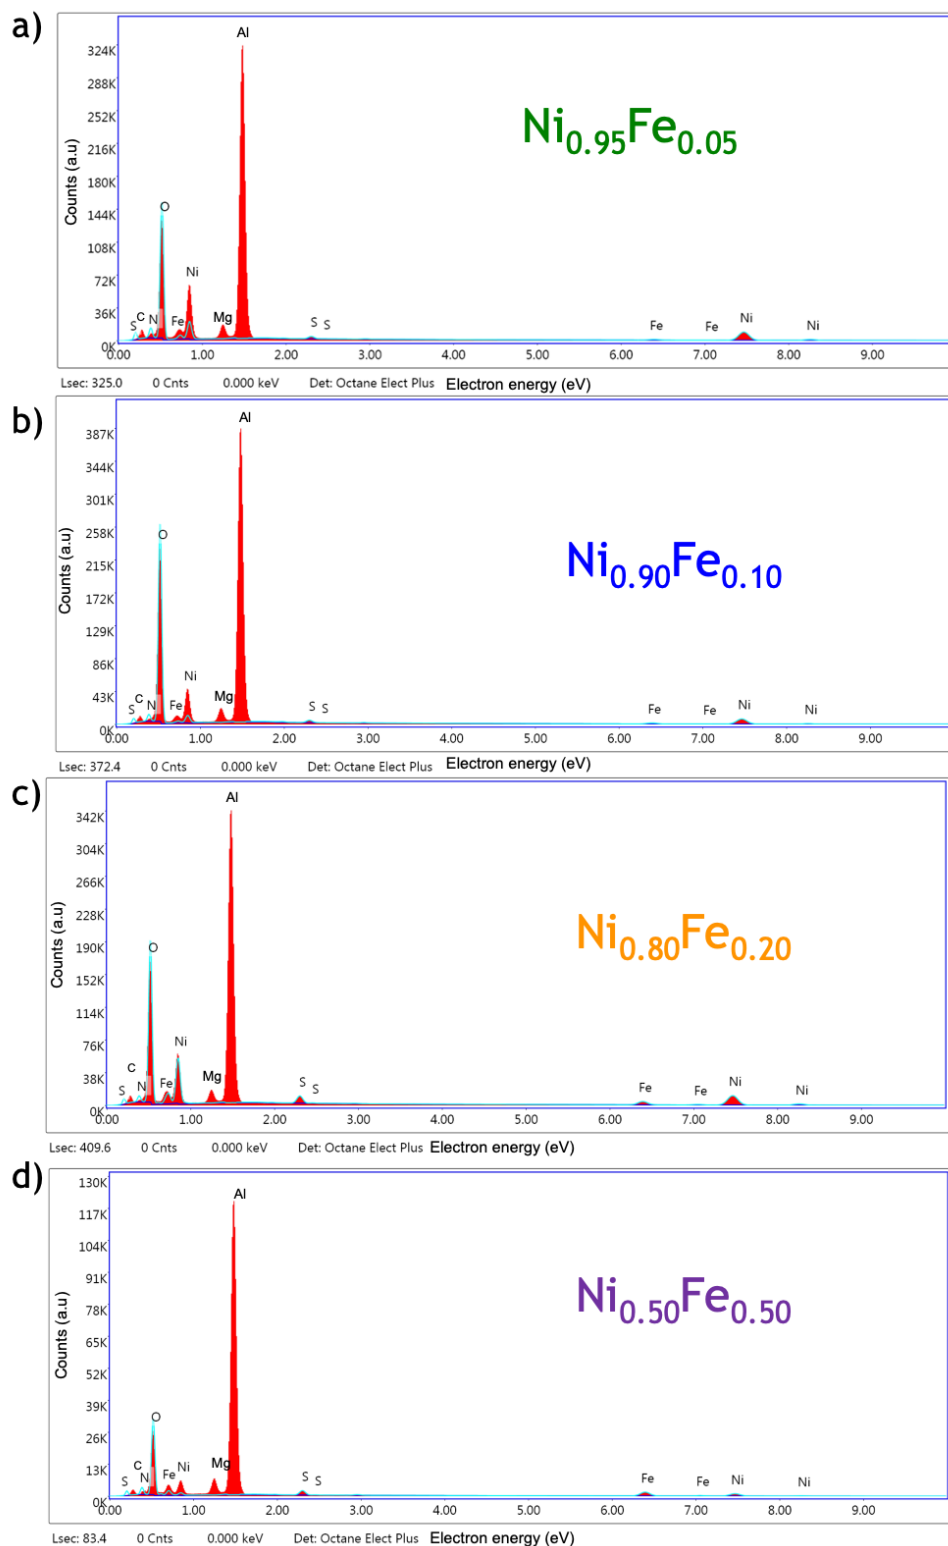

**Figure S3.** Energy dispersive X-ray spectra of a)  $\text{Ni}_{0.95}\text{Fe}_{0.05}$ , b)  $\text{Ni}_{0.90}\text{Fe}_{0.10}$ , c)  $\text{Ni}_{0.80}\text{Fe}_{0.20}$ , and d)  $\text{Ni}_{0.50}\text{Fe}_{0.50}$ .

**Table S2.** Average atomic % of elements determined by energy dispersive X-ray spectra.

|                                           | Ni           | Fe          | O            | N           | S           |
|-------------------------------------------|--------------|-------------|--------------|-------------|-------------|
| <b>Ni<sub>0.95</sub>Fe<sub>0.05</sub></b> | 17.87 ± 0.74 | 1.12 ± 0.11 | 66.51 ± 4.06 | 9.98 ± 0.05 | 0.91 ± 0.15 |
| <b>Ni<sub>0.90</sub>Fe<sub>0.10</sub></b> | 12.92 ± 5.44 | 2.08 ± 1.40 | 76.78 ± 7.78 | 6.02 ± 0.84 | 1.66 ± 1.19 |
| <b>Ni<sub>0.80</sub>Fe<sub>0.20</sub></b> | 14.46 ± 3.18 | 3.62 ± 0.13 | 73.12 ± 3.45 | 6.39 ± 0.28 | 2.41 ± 0.13 |
| <b>Ni<sub>0.50</sub>Fe<sub>0.50</sub></b> | 8.07 ± 0.05  | 8.43 ± 0.95 | 75.85 ± 0.66 | 5.20 ± 0.47 | 2.46 ± 1.13 |

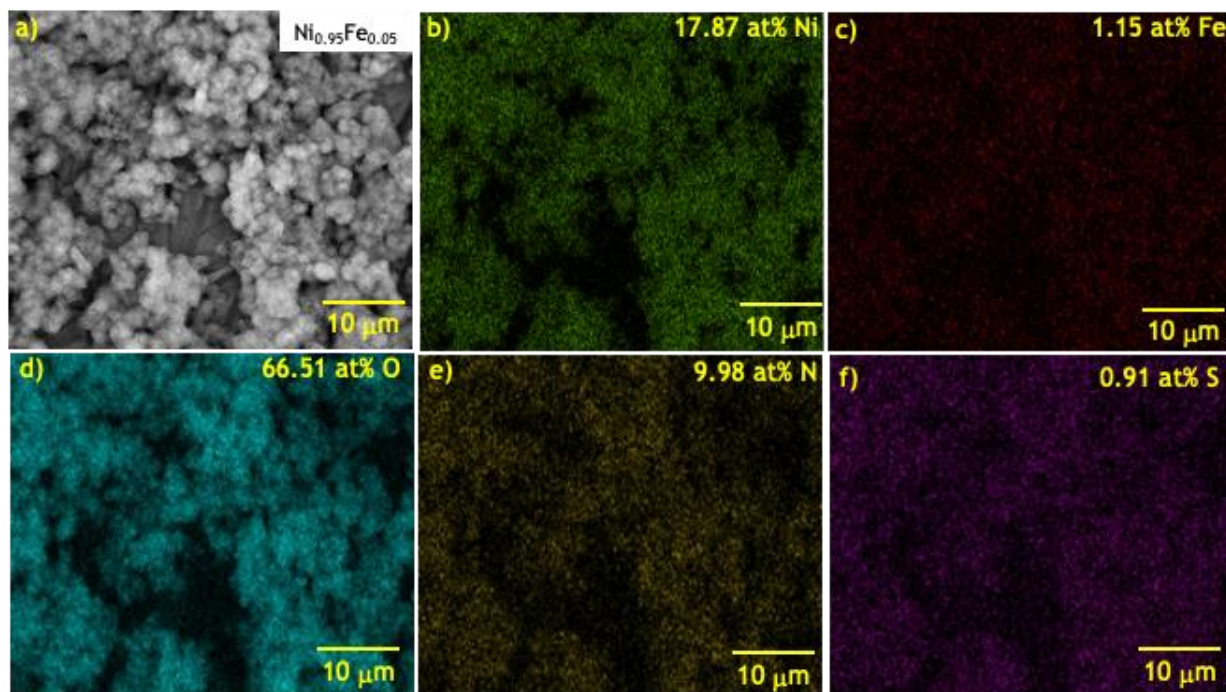

**Figure S4.** SEM image (a) and elemental mapping of Ni, Fe, O, N, and S (b-f) of 5% Fe-substituted Ni(OH)<sub>2</sub> nanosheets (Ni<sub>0.95</sub>Fe<sub>0.05</sub>).

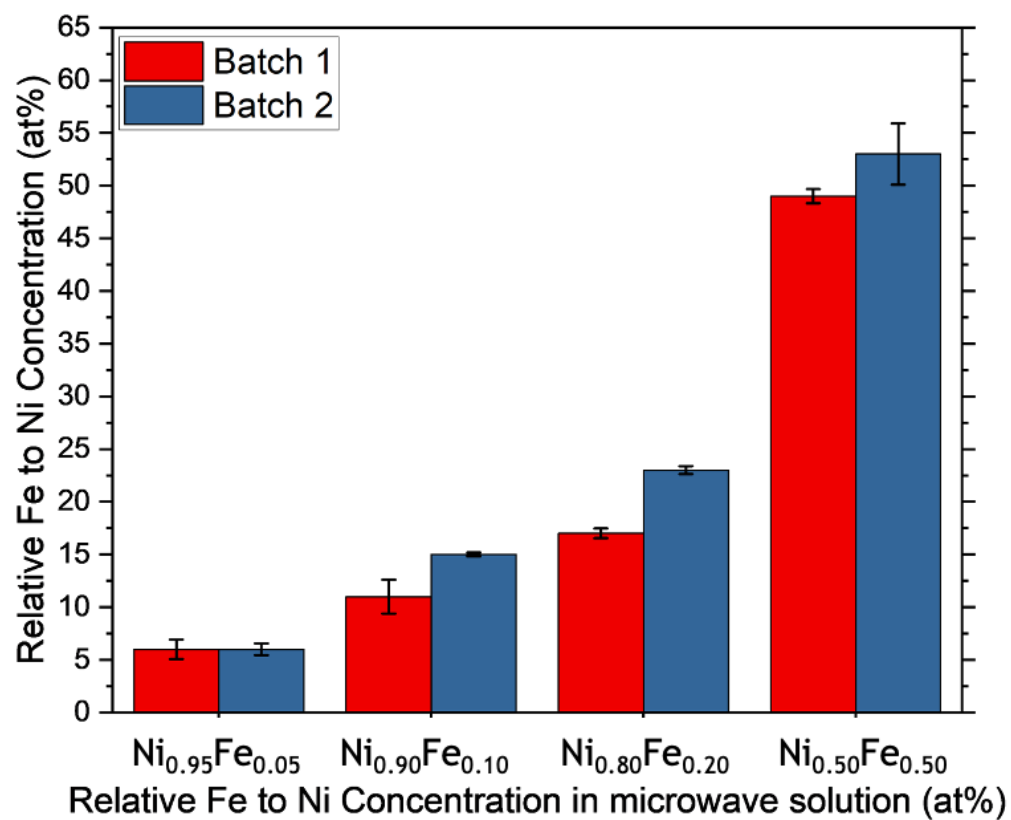

**Figure S5.** Comparison of the relative Fe-to-Ni concentration between two batches of material.

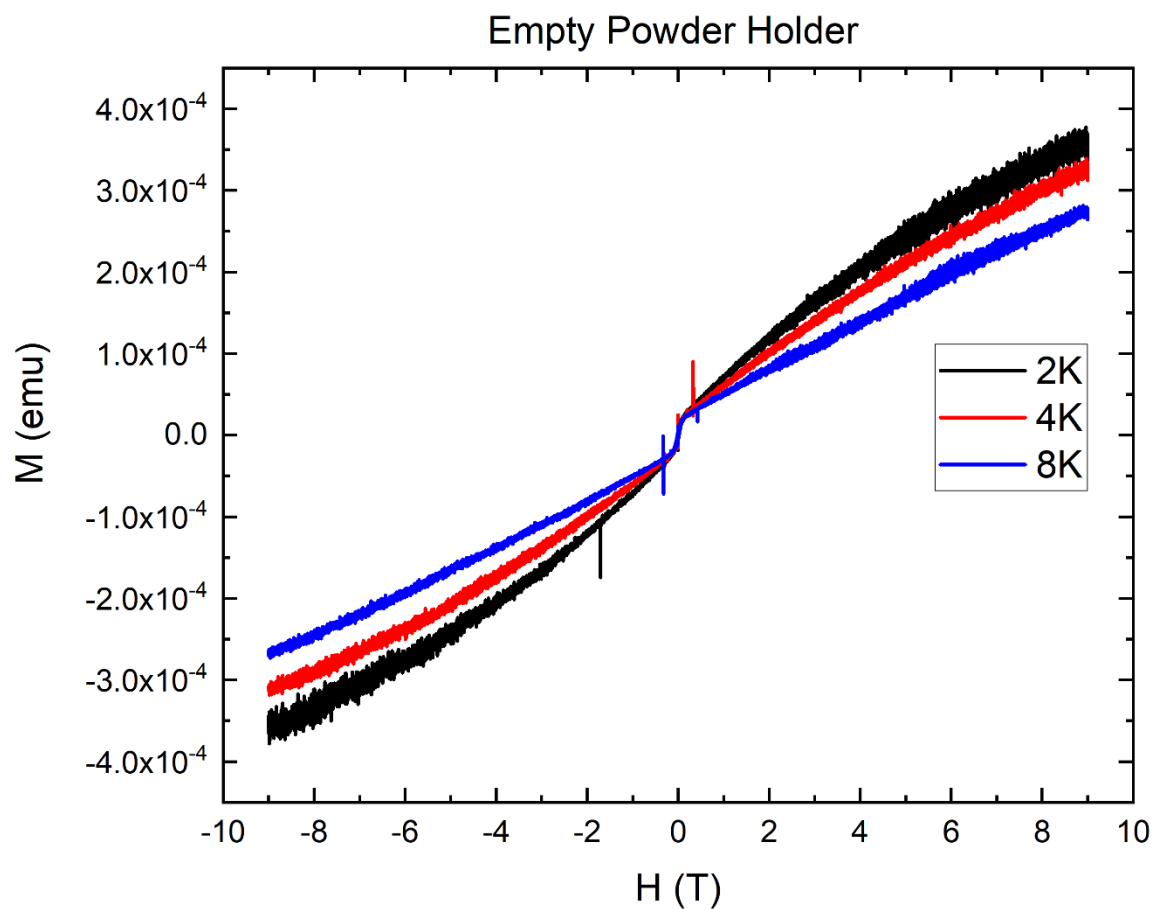

**Figure S6.** Magnetization versus magnetic field at 2 K, 4 K, and 8 K of an empty powder holder; the magnetization is two-three orders of magnitude smaller than the signal from the sample ensuring that the holder signal did not significantly contribute to the sample signal.

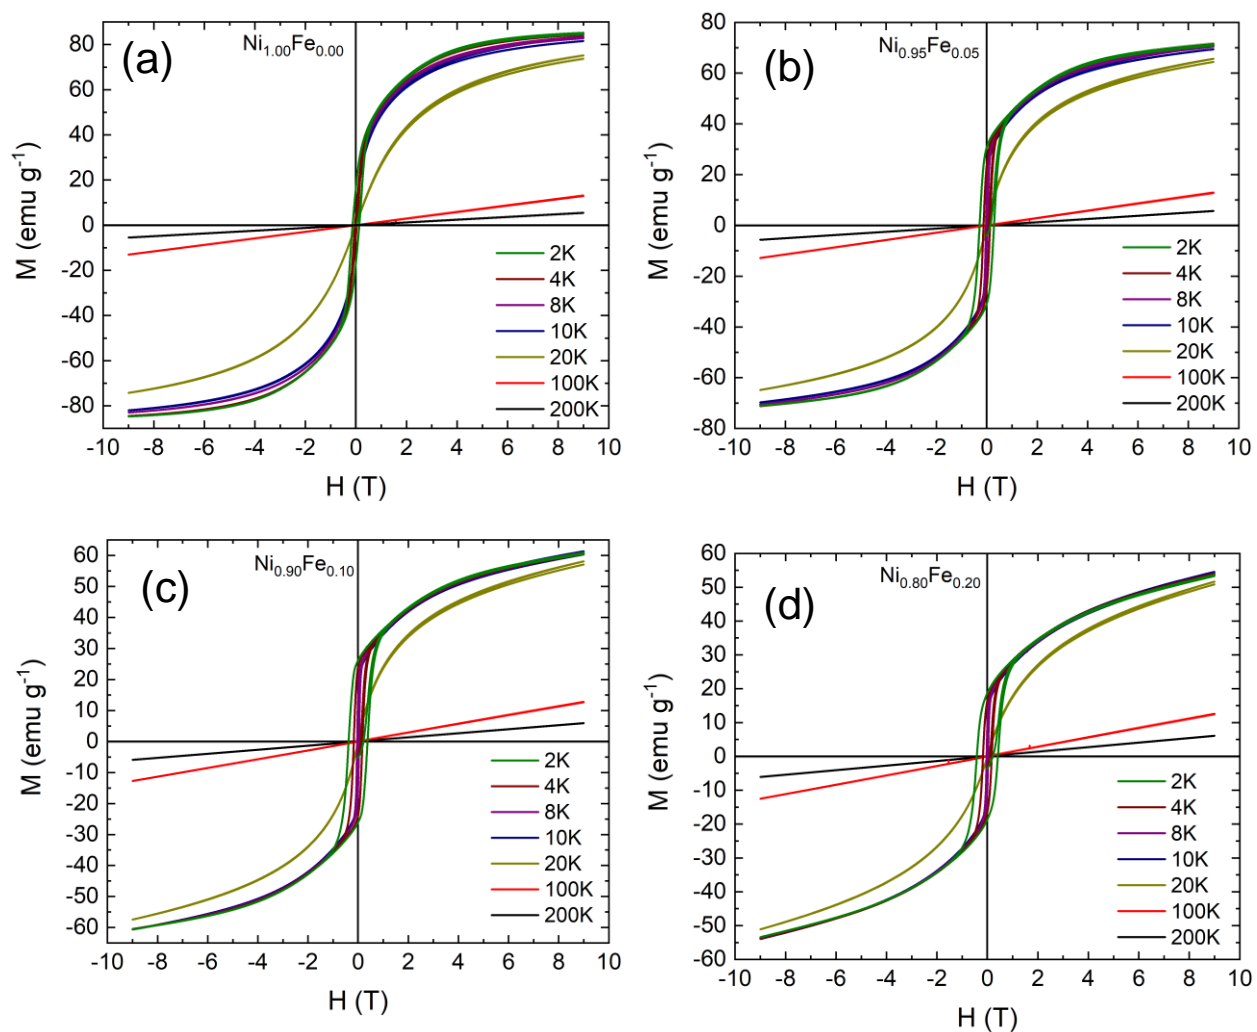

**Figure S7.**  $M$  vs  $H$  loops in the full range of the magnetic fields, +9 T to -9 T, at temperatures of 2-200 K for (a)  $\text{Ni}_{1.00}\text{Fe}_{0.00}$  (0% Fe), (b)  $\text{Ni}_{0.95}\text{Fe}_{0.05}$  (5% Fe), (c)  $\text{Ni}_{0.90}\text{Fe}_{0.10}$  (10% Fe), and (d)  $\text{Ni}_{0.80}\text{Fe}_{0.20}$  (20% Fe). One feature of the loops of the 10% and 20% Fe is the lack of saturation which points to the existence of noncollinear (canted) magnetic structure.



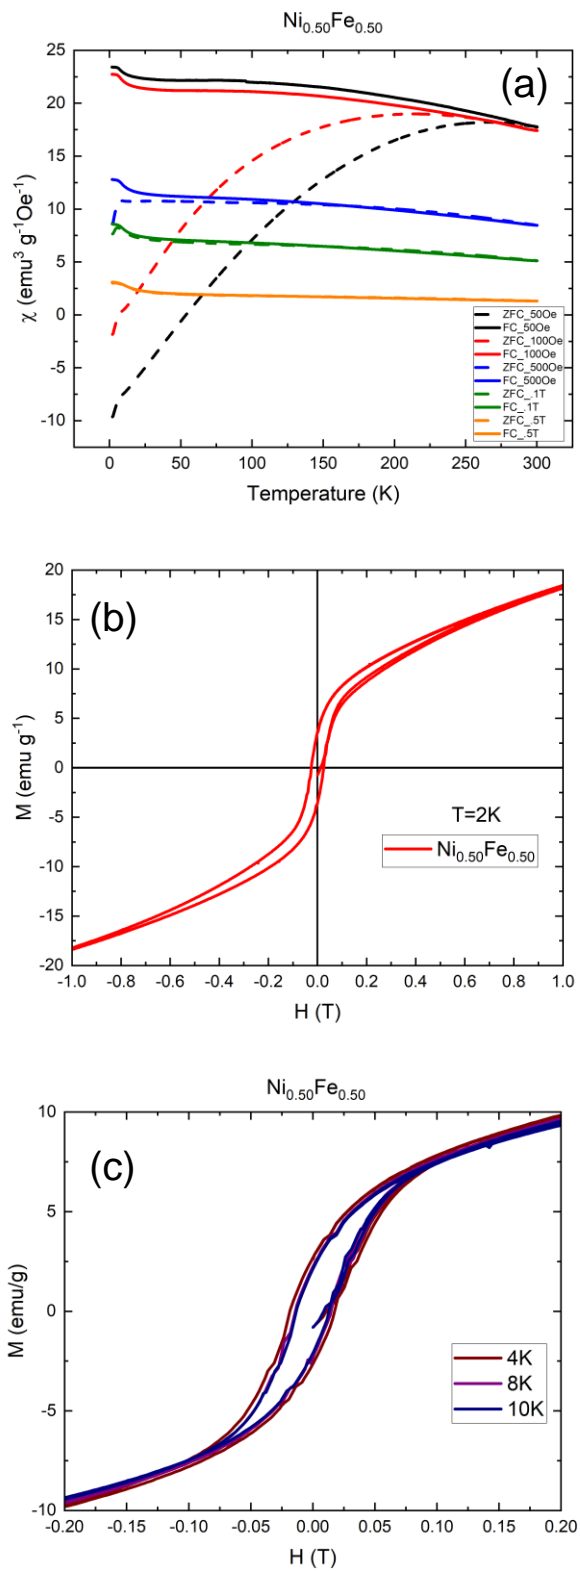

**Figure S8.** (a) FC and ZFC Magnetization, (b) M-H loop at 2 K, and (c) M-H loops at 4 K, 8 K, 10 K for 50 % Fe ( $\text{Ni}_{0.50}\text{Fe}_{0.50}$ ).
